# Supplementary material for: Propranolol can induce PTSD‐like memory impairments in rats
Source: PubMed Central journal article supplement (PMC5822589; doi:10.1002/brb3.905), 2018-01-18
Supplement: BRB3-8-e00905-s001.pdf [file BRB3-8-e00905-s001.pdf]

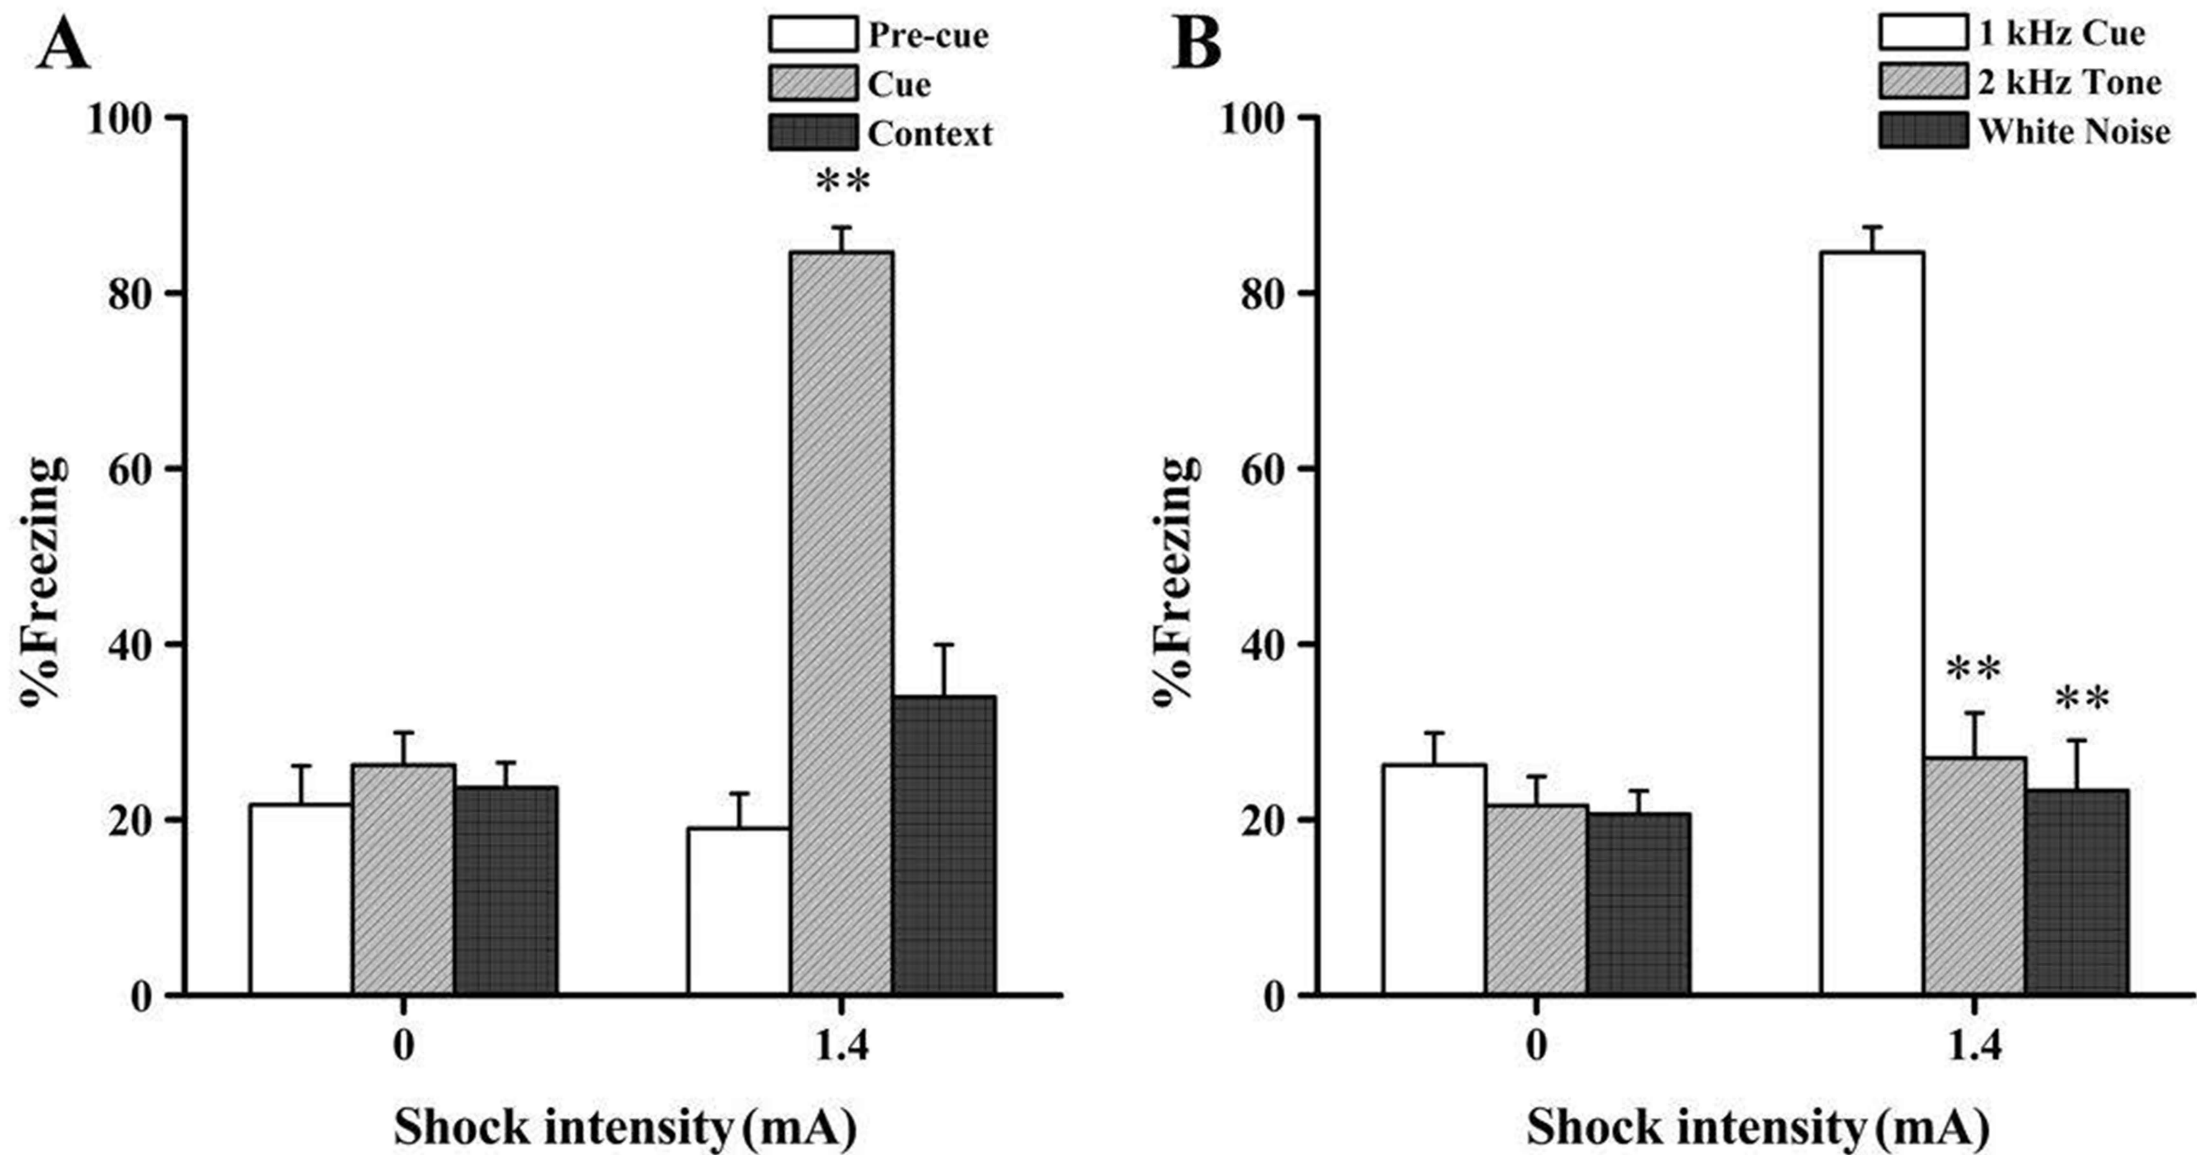

**Fig. S1. Auditory fear conditioning.** (A) Normal rats identified the cue and not the conditioning context as the correct predictor of the shock.  $**P < 0.01$  compared with 0 mA. (B) Normal rats discriminated the auditory tones of 1 and 2 kHz. Rats exhibited an increased response to the 1-kHz cue, but not to the 2-kHz tone or white noise.  $**P < 0.01$  compared to the 1-kHz cue (n = 5-6 per group).
