# Supplementary material for: Propranolol can induce PTSD‐like memory impairments in rats
Source: PubMed Central journal article supplement (PMC5822589; doi:10.1002/brb3.905), 2018-01-18
Supplement: BRB3-8-e00905-s002.pdf [file BRB3-8-e00905-s002.pdf]

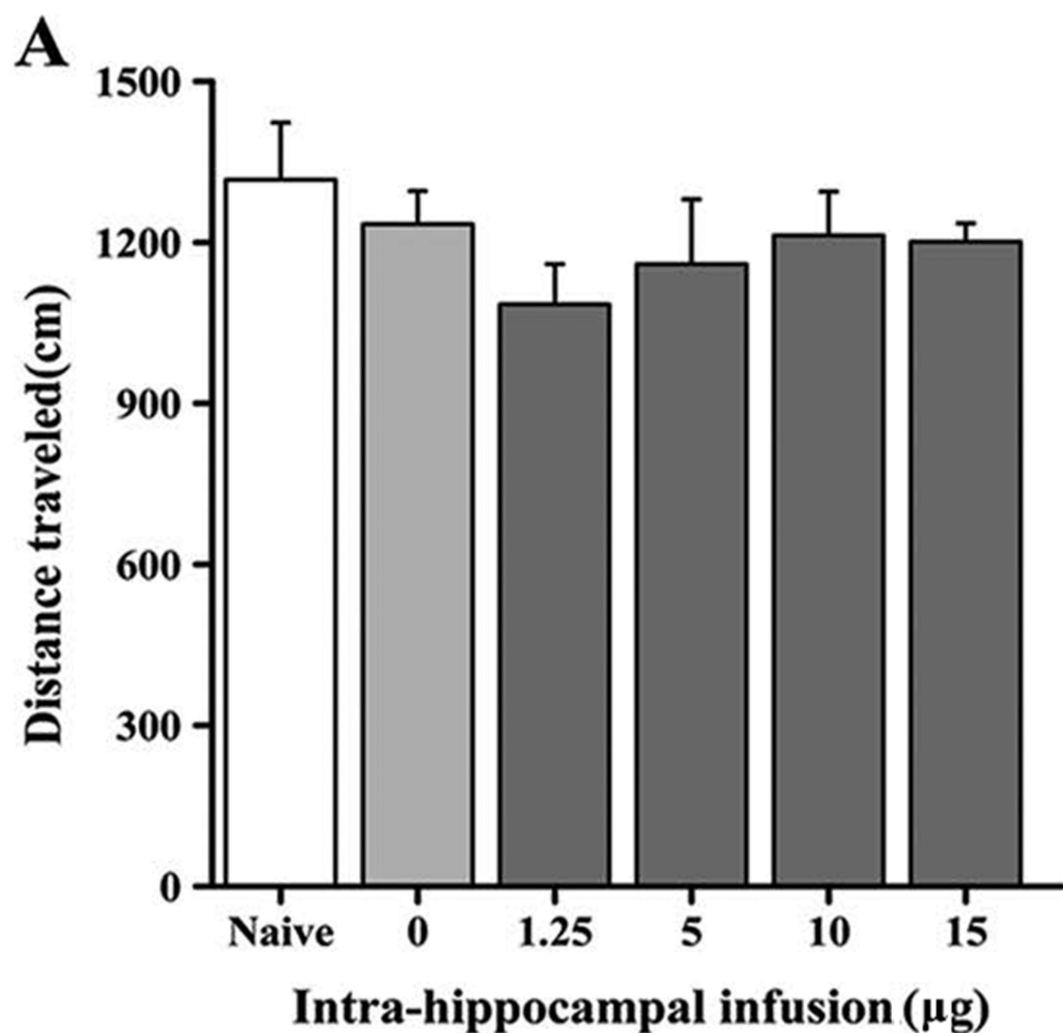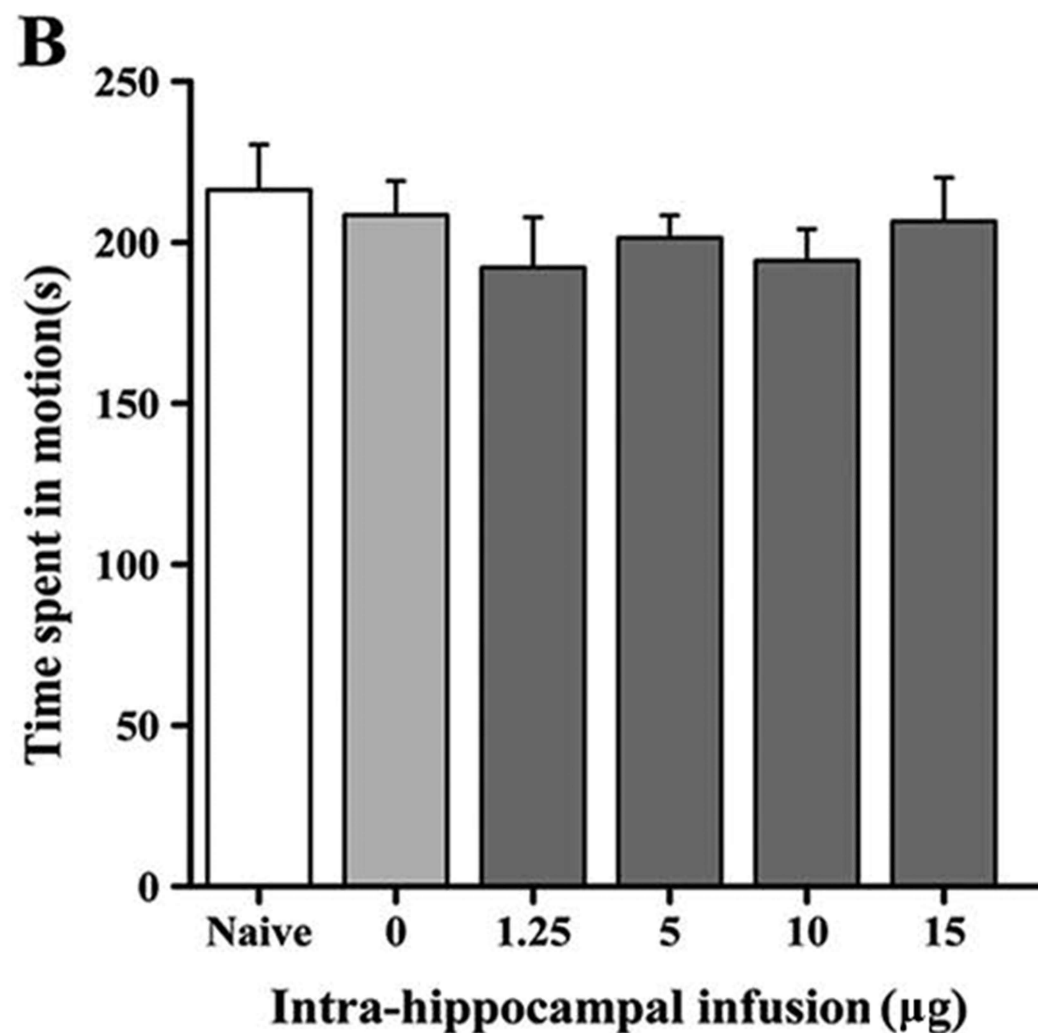

**Fig. S2. Effects of bilateral microinjections of different doses of propranolol into the dorsal hippocampus on the exploratory activity in response to a novel condition.** There were no significant effects of different injections on overall locomotion -- either the distance travelled or time spent in motion ( $n = 5$  per group).
