# Supplementary material for: Propranolol can induce PTSD‐like memory impairments in rats
Source: PubMed Central journal article supplement (PMC5822589; doi:10.1002/brb3.905), 2018-01-18
Supplement: BRB3-8-e00905-s003.pdf [file BRB3-8-e00905-s003.pdf]

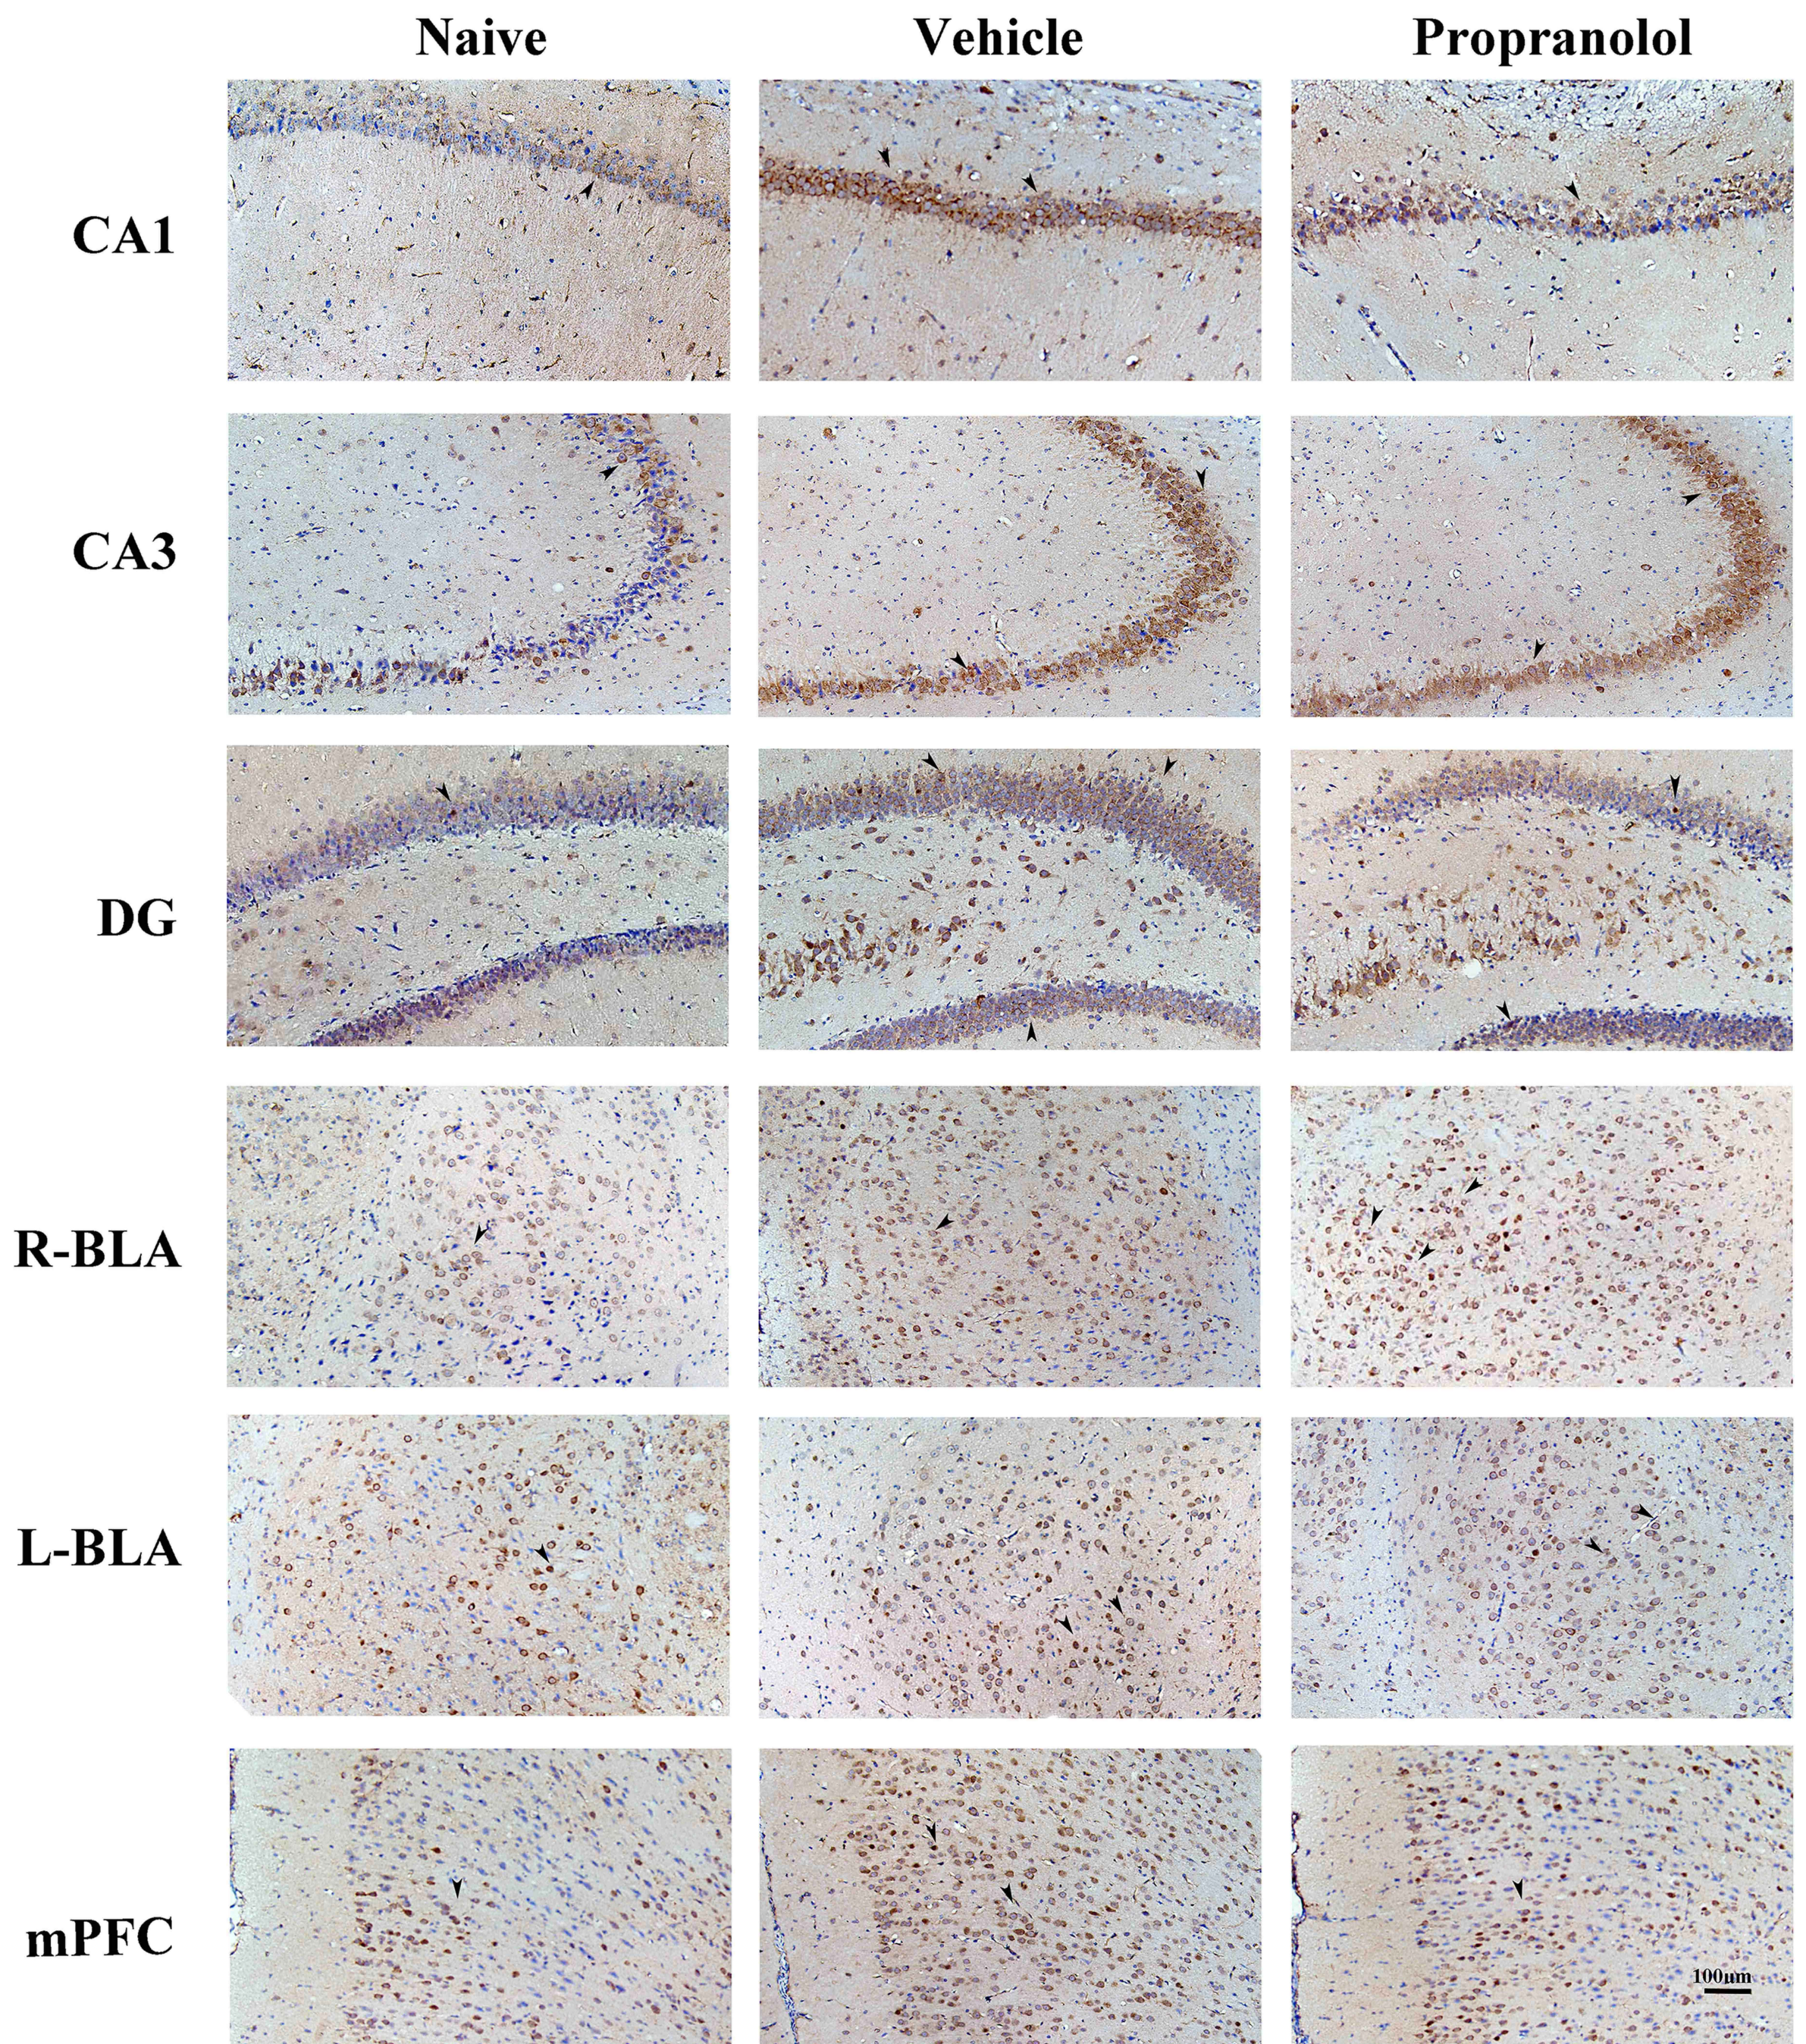

**Fig. S3. Representative microphotographs of c-Fos immunoreactivity in specific brain areas of rats that received intra-dorsal hippocampal injections of saline or propranolol (5 µg/0.5 µl) immediately after conditioning with 1.4-mA foot shocks.**
